# Supplementary material
Source: publisher site journal article supplement (https://www.dovepress.com/article/356925)
Supplement: Supplementary file 1 [file get_supplementary_file.php]

**Table S1. International Classification of pneumonia, tenth revision [ICD-10] codes**

| Acute myocardial infarction | I21 |
| --- | --- |
| Acute transmural myocardial infarction of anterior wall | I21.0 |
| Acute transmural myocardial infarction of inferior wall | I21.1 |
| Acute transmural myocardial infarction of other sites | I21.2 |
| Acute transmural myocardial infarction of unspecified sites | I21.3 |
| Acute subendocardial myocardial infarction | I21.4 |
| Acute myocardial infarction, unspecified | I21.9 |
| Atrioventricular block, second degree | I44.1 |
| Atrioventricular block, complete | I44.2 |
| Left anterior fascicular block | I44.4 |
| Left posterior fascicular block | I44.5 |
| Left bundle-branch block, unspecified | I44.7 |
| Pre-excitation syndrome | I45.6 |
| Cardiac arrest | I46 |
| Sudden cardiac death, so described | I46.1 |
| Cardiac arrest, unspecified | I46.9 |
| Paroxysmal tachycardia | I47 |
| Supraventricular tachycardia | I47.1 |
| Ventricular tachycardia | I47.2 |
| Atrial fibrillation and flutter | I48 |
| Ventricular fibrillation and flutter | I49.0 |
| Sick sinus syndrome | I49.5 |
| Congestive heart failure | I50.0 |
| Left ventricular failure | I50.1 |
| Subarachnoid haemorrhage | I60 |
| Intracerebral haemorrhage | I61 |
| Other nontraumatic intracranial haemorrhage | I62 |
| Cerebral infarction | I63 |
| Stroke, not specified as hemorrhage or infarction | I64 |
| Transient ischemic attack | G45 |
| Pulmonary embolism | I26 |
| Deep vein thrombosis | I80.2 |
| Embolism or thrombosis of lower extremity | I80.3 |
| Embolism and thrombosis of vena cava | I82.2 |
